# Supplementary material
Source: PubMed Central journal article supplement (PMC7857995)

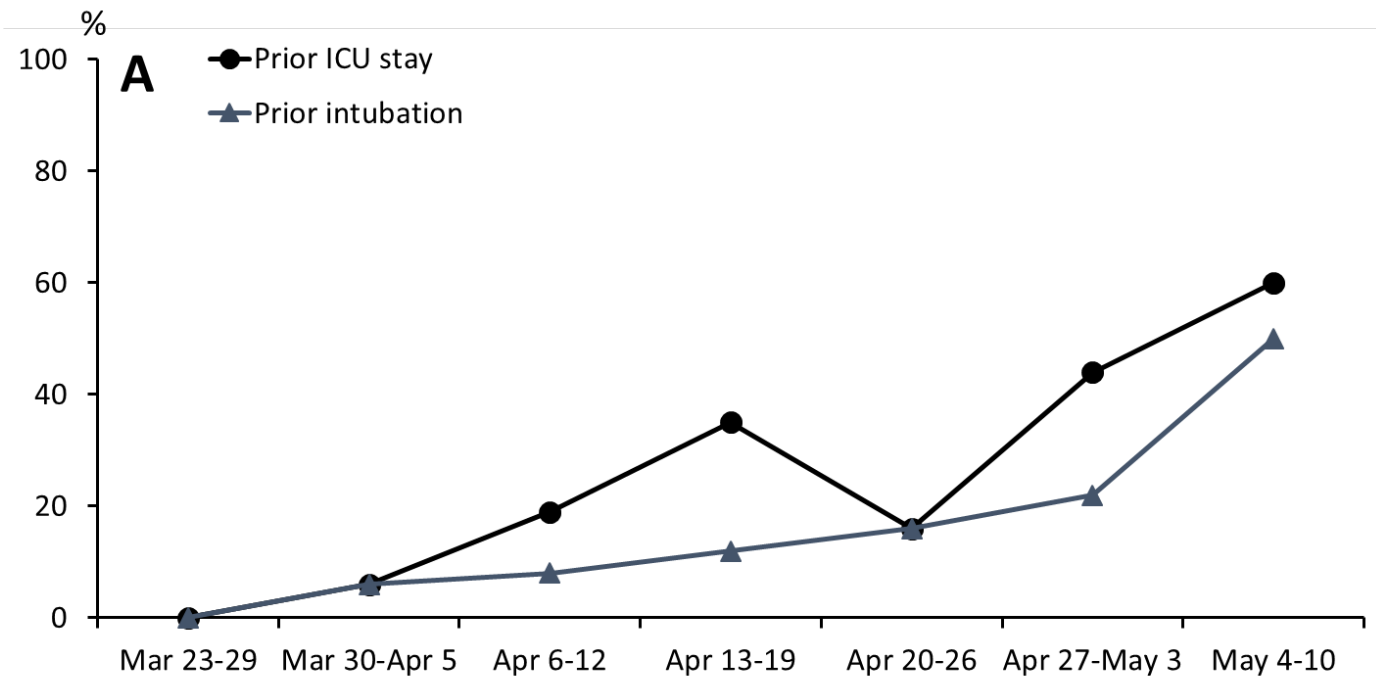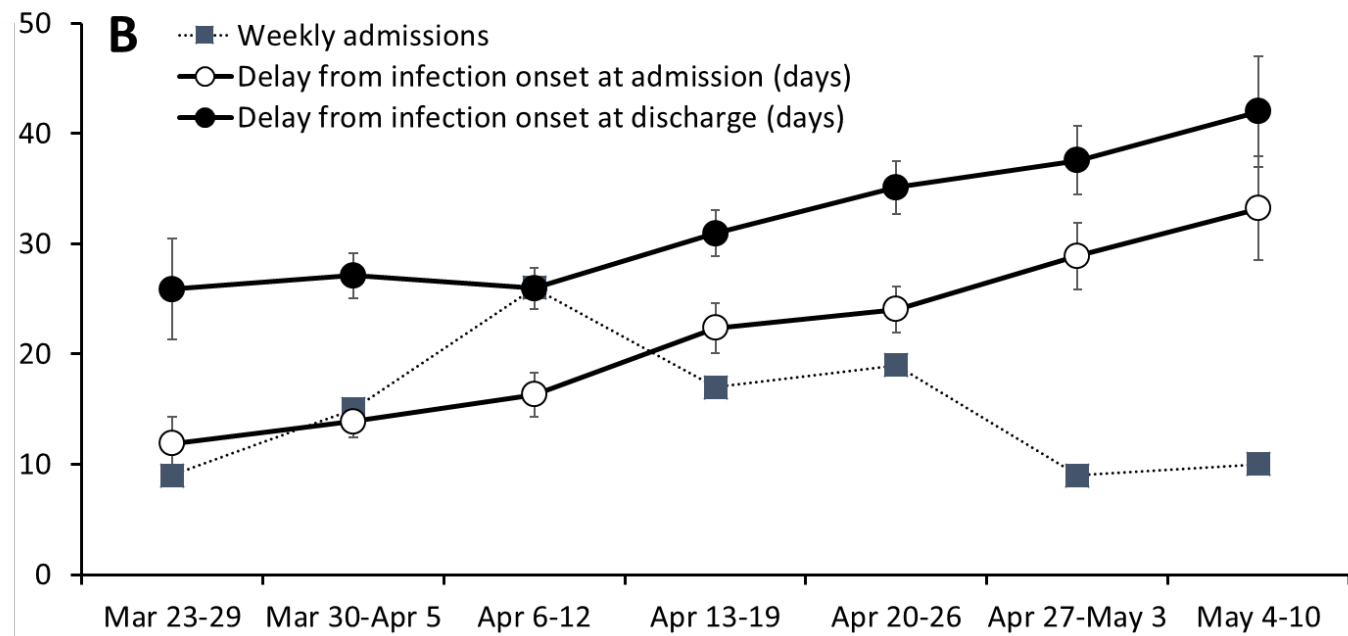

Supplement: mmc2.pdf [file mmc2.pdf]

- In acute care units
- In intensive care units
- In rehabilitation units

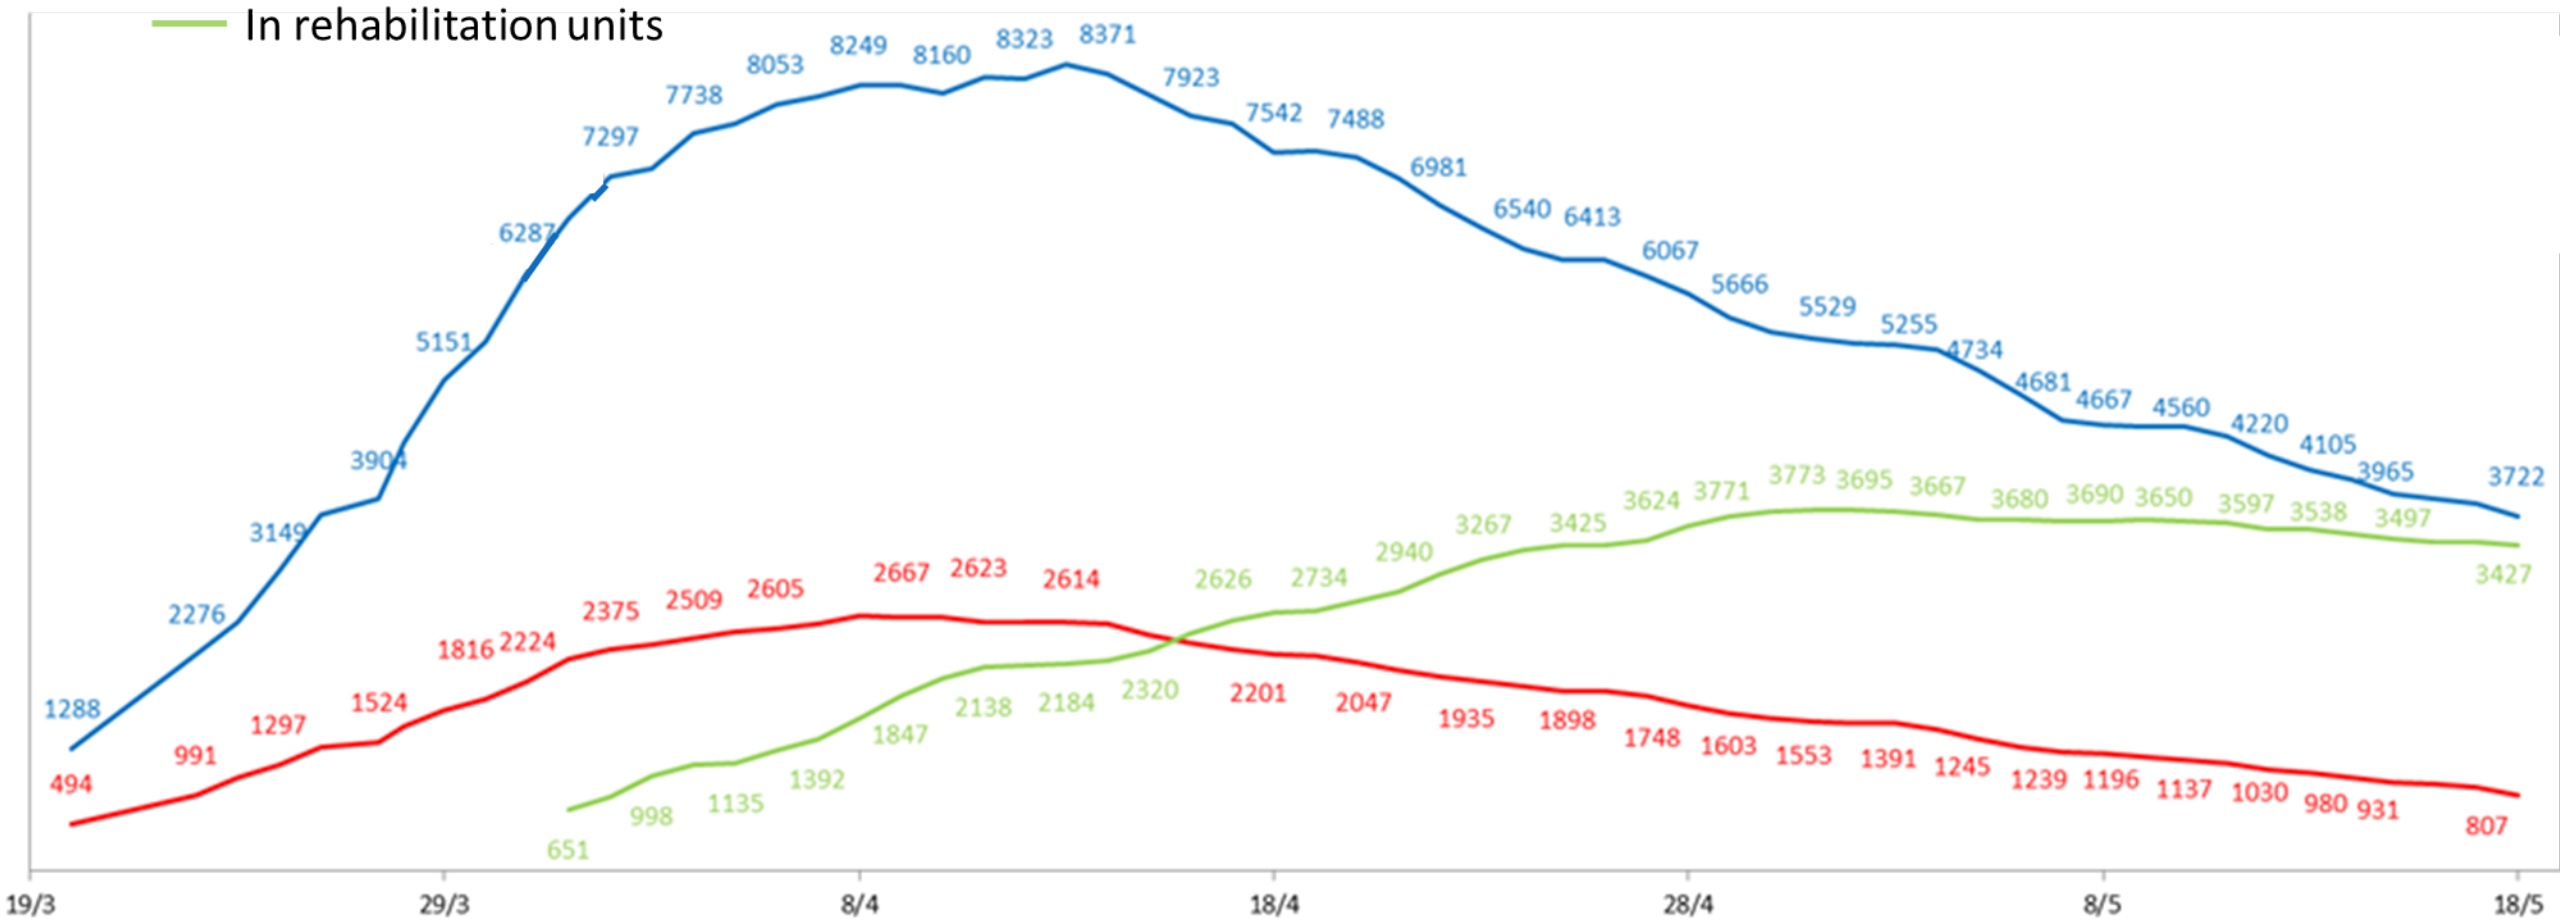

Supplement: mmc3.pdf [file mmc3.pdf]
